# Supplementary material
Source: publisher site journal article supplement (https://www.dovepress.com/article/275188)
Supplement: Supplementary file 1 [file get_supplementary_file.php]

**Supplementary Table 1**

Pvc location based on Park algorithm and EPS with ejection fraction

| No | PVC location based on Park Algorithm | PVC location based on EPS | EF | Congruity | Ablation |
| --- | --- | --- | --- | --- | --- |
| 1 | RVOT Anterior (OT) | RVOT Anterior | 76 | Congruent | successful ablation |
| 2 | RVOT Anterior (OT), Non Annular RV (NonOT) | RVOT Posteroseptal (Posterior Regio HIS) | 63 | Not Congruent | successful ablation |
| 3 | RVOT Posterior Regio HIS (OT), Parahisian, Pulmonary Artery, Non Annular RV (NonOT) | RVOT Posteroseptal (Posterior Regio HIS) | 61 | Congruent | unsuccesful ablation |
| 4 | RVOT Posterior Regio HIS (OT), Parahisian, Pulmonary Artery, Non Annular RV (NonOT) | RVOT Anterior | 65 | Not Congruent | successful ablation |
| 5 | LV Papillary Muscle Anterior (NonOT) | LV Anterolateral (Papillary Muscle Anterior) | 29 | Congruent | successful ablation |
| 6 | LVOT Aorto Mitral Continuity (OT), LV Muskulus Papillaris Anterior (NonOT) | LV Anterolateral (Papillary Muscle Anterior) | 67 | Congruent | successful ablation |
| 7 | RVOT Anterior (OT) | RVOT Anterior | 64 | Congruent | partial successful ablation |
| 8 | RVOT Posterior Regio HIS (OT), Parahisian, Non Annular RV (NonOT) | RV Non Annular | 37 | Congruent | successful ablation |
| 9 | RVOT Posterior Regio HIS (OT) | RVOT Posteroseptal (Posterior Regio HIS) | 59 | Congruent | successful ablation |
| 10 | RVOT Posterior Regio HIS (OT), Non Annular RV (NonOT) | RVOT Posteroseptal (Posterior Regio HIS) | 59 | Congruent | successful ablation |
| 11 | LV Papillary Muscle Posterior (NonOT) | LV Posteromedial (Papillary Muscle Posterior) | 17 | Congruent | successful ablation |
| 12 | RVOT Posterior Regio HIS (OT), Parahisian, Pulmonary Artery, Non Annular RV (NonOT) | RV Non Annular | 65 | Congruent | successful ablation |
| 13 | RVOT Anterior (OT), Non Annular RV (NonOT) | RVOT Anterior | 60 | Congruent | successful ablation |
| 14 | RVOT Anterior (OT), Parahisian, Trikuspid Annulus (NonOT) | RVOT Anterior | 61 | Congruent | successful ablation |
| 15 | LV Mitral Annulus atau Fasikulus Anterior (NonOT) | LV Mitral Annulus atau Fasikulus Anterior | 58 | Congruent | partial successful ablation |
| 16 | RVOT Posterior Regio HIS (OT), Parahisian, Pulmonary Artery, Trikuspid Annulus (NonOT) | RVOT Posteroseptal (Posterior Regio HIS) | 61 | Congruent | successful ablation |
| 17 | RVOT Anterior (OT), Non Annular RV (NonOT) | RVOT Anterior | 61 | Congruent | successful ablation |
| 18 | RVOT Anterior (OT) | RVOT Anterior | 68 | Congruent | successful ablation |
| 19 | RVOT Anterior (OT), Parahisian, Pulmonary Artery, Non Annular RV (NonOT) | RVOT Anterior | 61 | Congruent | successful ablation |
| 20 | LV Papillary Muscle Anterior (NonOT) | LV Anterolateral (Papillary Muscle Anterior) | 30 | Congruent | successful ablation |
| 21 | RVOT Posterior Free Wall (OT), Trikuspid Annulus (NonOT) | RVOT Posteroseptal (Posterior Regio HIS) | 65 | Congruent | successful ablation |
| 22 | LV Papillary Muscle Anterior (NonOT) | LV Posteromedial (Papillary Muscle Posterior) | 58 | Not Congruent | successful ablation |
| 23 | RVOT Anterior (OT), Parahisian, Trikuspid Annulus (NonOT) | RVOT Anterior | 55 | Congruent | successful ablation |
| 24 | RVOT Posterior Regio HIS (OT), Parahisian, Pulmonary Artery, Non Annular RV (NonOT) | RVOT Posteroseptal (Posterior Regio HIS) | 69 | Congruent | successful ablation |
| 25 | LVOT LCC (OT) | RVOT Posteroseptal (Posterior Regio HIS) | 54 | Not Congruent | successful ablation |
| 26 | LV Mitral Annulus atau Fasikulus Anterior (NonOT) | LV Mitral Annulus atau Fasikulus Anterior | 54 | Congruent | successful ablation |
| 27 | RVOT Posterior Regio Freewall (OT), Parahisian, Trikuspid Annulus (NonOT) | RVOT Posterolateral (Posterior Regio Freewall) | 60 | Congruent | successful ablation |
| 28 | RVOT Anterior, Pulmonary Artery, Non Annular RV (NonOT) | No PVC Induced | 61 | No PVC Induced | No PVC Induced |
| 29 | LVOT Righ Coronary Cuspis Aorta (OT), Mitral Annulus atau Fasikulus Posterior (NonOT) | No PVC Induced | 34 | No PVC Induced | No PVC Induced |
| 30 | RVOT Anterior (OT) | No PVC Induced | 56 | No PVC Induced | No PVC Induced |
| 31 | LVOT RCC (OT), LV Mitral Annulus atau Fasikulus Anterior (NonOT) | No PVC Induced | 64 | No PVC Induced | No PVC Induced |
